# Supplementary material for: Assessing the nationwide impact of COVID-19 mitigation policies on the transmission rate of SARS-CoV-2 in Brazil
Source: bioRxiv or medRxiv preprint supplement (doi:10.1101/2020.06.26.20140780), 2021-03-16
Supplement: Supplementary file [file 2020.06.26.20140780-2.pdf]

Table S2: Classification of the measures implemented in Brazilian states as a response to the COVID-19 spread.

| ID | Name                                                                              | Coding Instructions                                                                                                                                                                                                                                                                                                                                      |
|----|-----------------------------------------------------------------------------------|----------------------------------------------------------------------------------------------------------------------------------------------------------------------------------------------------------------------------------------------------------------------------------------------------------------------------------------------------------|
| O1 | Cancel public events                                                              | 0 - No measures<br>1 - Ban of public events and public facilities<br>2 - Restrictions on very large gatherings (above 500 people)<br>3 - Restrictions on gatherings between 100-499 people<br>4 - Restrictions on gatherings between 50-99 people<br>5 - Restrictions on gatherings between 5-49 people<br>6 - Total ban on crowded events or activities |
|    |                                                                                   | 0 - Targeted or conditional<br>1 - General                                                                                                                                                                                                                                                                                                               |
| O2 | Closure of schools/universities                                                   | 0 - No measures<br>1 - Suggests closure<br>2 - Require closing                                                                                                                                                                                                                                                                                           |
|    |                                                                                   | 0 - Targeted or conditional<br>1 - General                                                                                                                                                                                                                                                                                                               |
| O3 | Home-office for government employees                                              | 0 - No measures<br>1 - Home-office for those with symptoms or from some risk groups<br>2 - Optional home-office<br>3 - Strategic scheduling work<br>4 - Mandatory home-office                                                                                                                                                                            |
|    |                                                                                   | 0 - Targeted or conditional<br>1 - General                                                                                                                                                                                                                                                                                                               |
| O4 | Isolation                                                                         | 0 - No measures<br>1 - Vertical isolation<br>2 - Horizontal isolation                                                                                                                                                                                                                                                                                    |
|    |                                                                                   | 0 - Targeted or conditional<br>1 - General                                                                                                                                                                                                                                                                                                               |
| C1 | Closure of non-essential businesses and public activities                         | 0 - No measures<br>Closure of malls<br>Suspension of non-essential businesses<br>Suspension of bars and restaurants<br>Ban of activities in public spaces (beaches, parks, etc)<br>Suspension of religious activities<br>Closure of cultural places (theater, cinema, museum)<br>Closure of gyms                                                         |
|    |                                                                                   | The sum of the measures that was general                                                                                                                                                                                                                                                                                                                 |
| C2 | Transport lock<br><small>**Considering only road and river transportation</small> | 0 - No measures<br>Suspension on city buses<br>Suspension on inter-cities buses<br>Suspension on inter-state buses<br>Total transportation suspension in the city<br>Total transportation suspension inter cities<br>Total transportation suspension inter states                                                                                        |
|    |                                                                                   | The sum of the measures that was general                                                                                                                                                                                                                                                                                                                 |
